# Supplementary material for: Linkage control between molecular and supramolecular chirality in 21-helical hydrogen-bonded networks using achiral components
Source: PubMed Central journal article supplement — Nat Commun. 2013 Apr 30;4:1787–. doi: 10.1038/ncomms2756 (PMC3644081; doi:10.1038/ncomms2756), 2013-04-30
Supplement: ncomms2756-s1.pdf [file ncomms2756-s1.pdf]

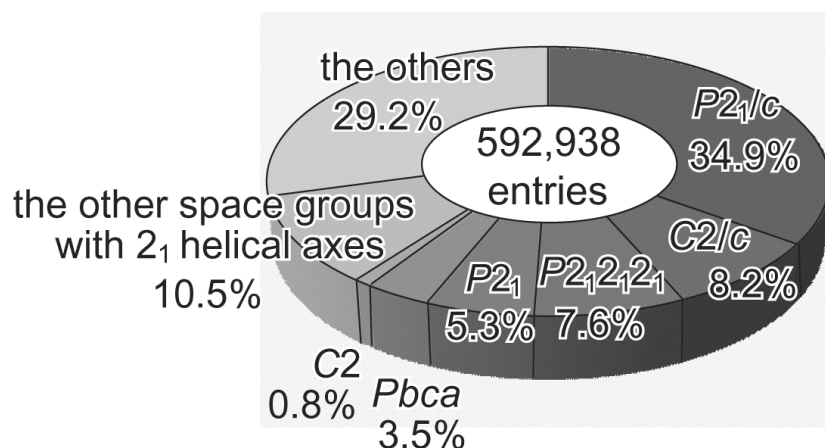

**Supplementary Figure S1. Graphical representation of space group statistics for crystals registered in the Cambridge Structural Database (Jan. 1. 2012).**

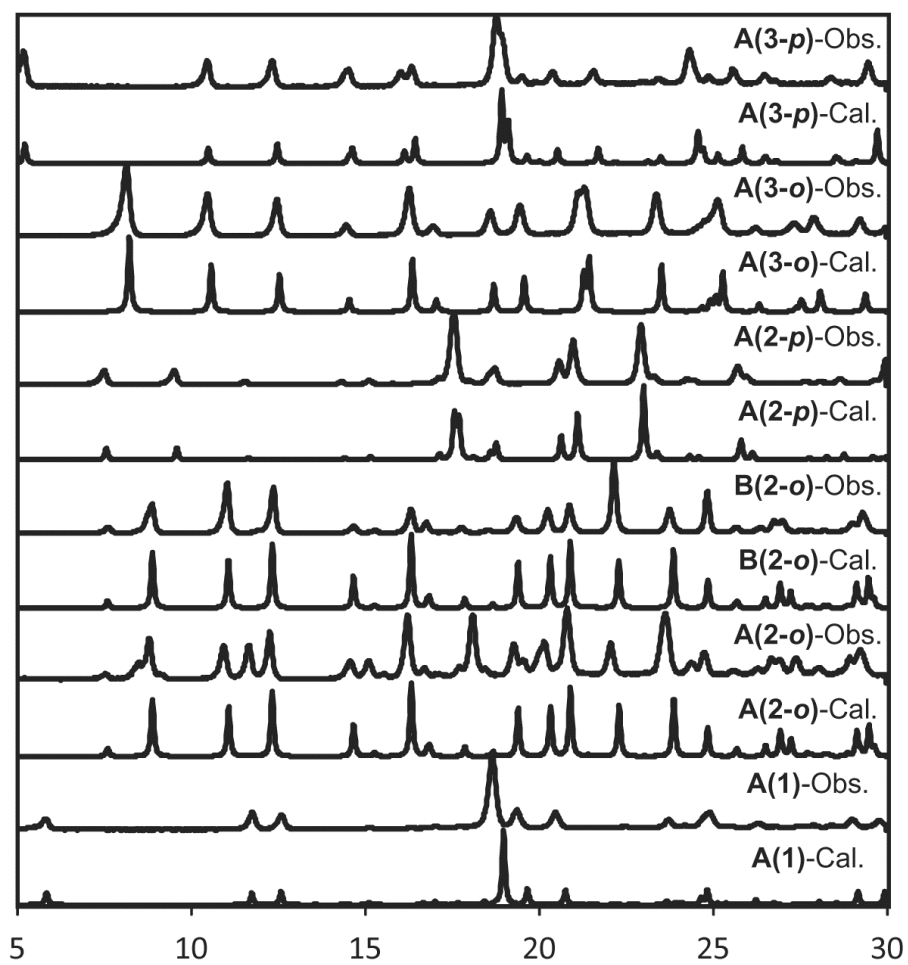

Supplementary Figure S2. Powder X-ray diffraction patterns of the A(1) to A(3-*p*) salts.

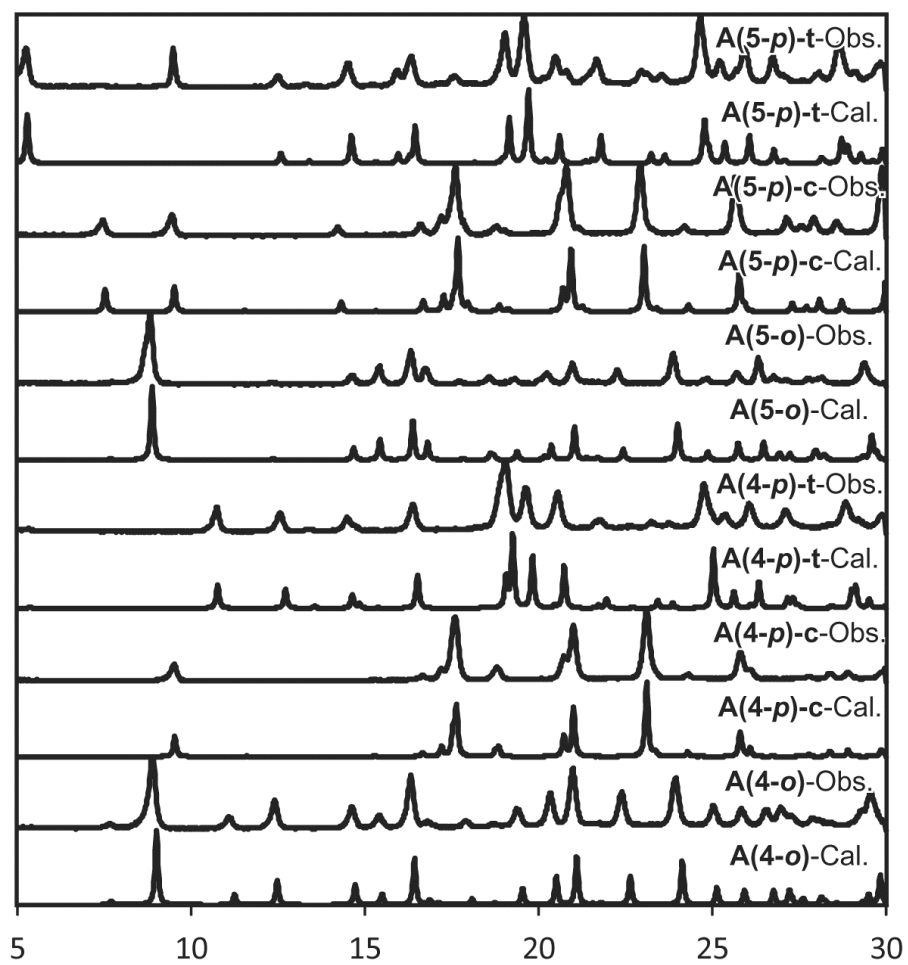

Supplementary Figure S3. Powder X-ray diffraction patterns of the A(4-*o*) to A(5-*p*)-t salts.

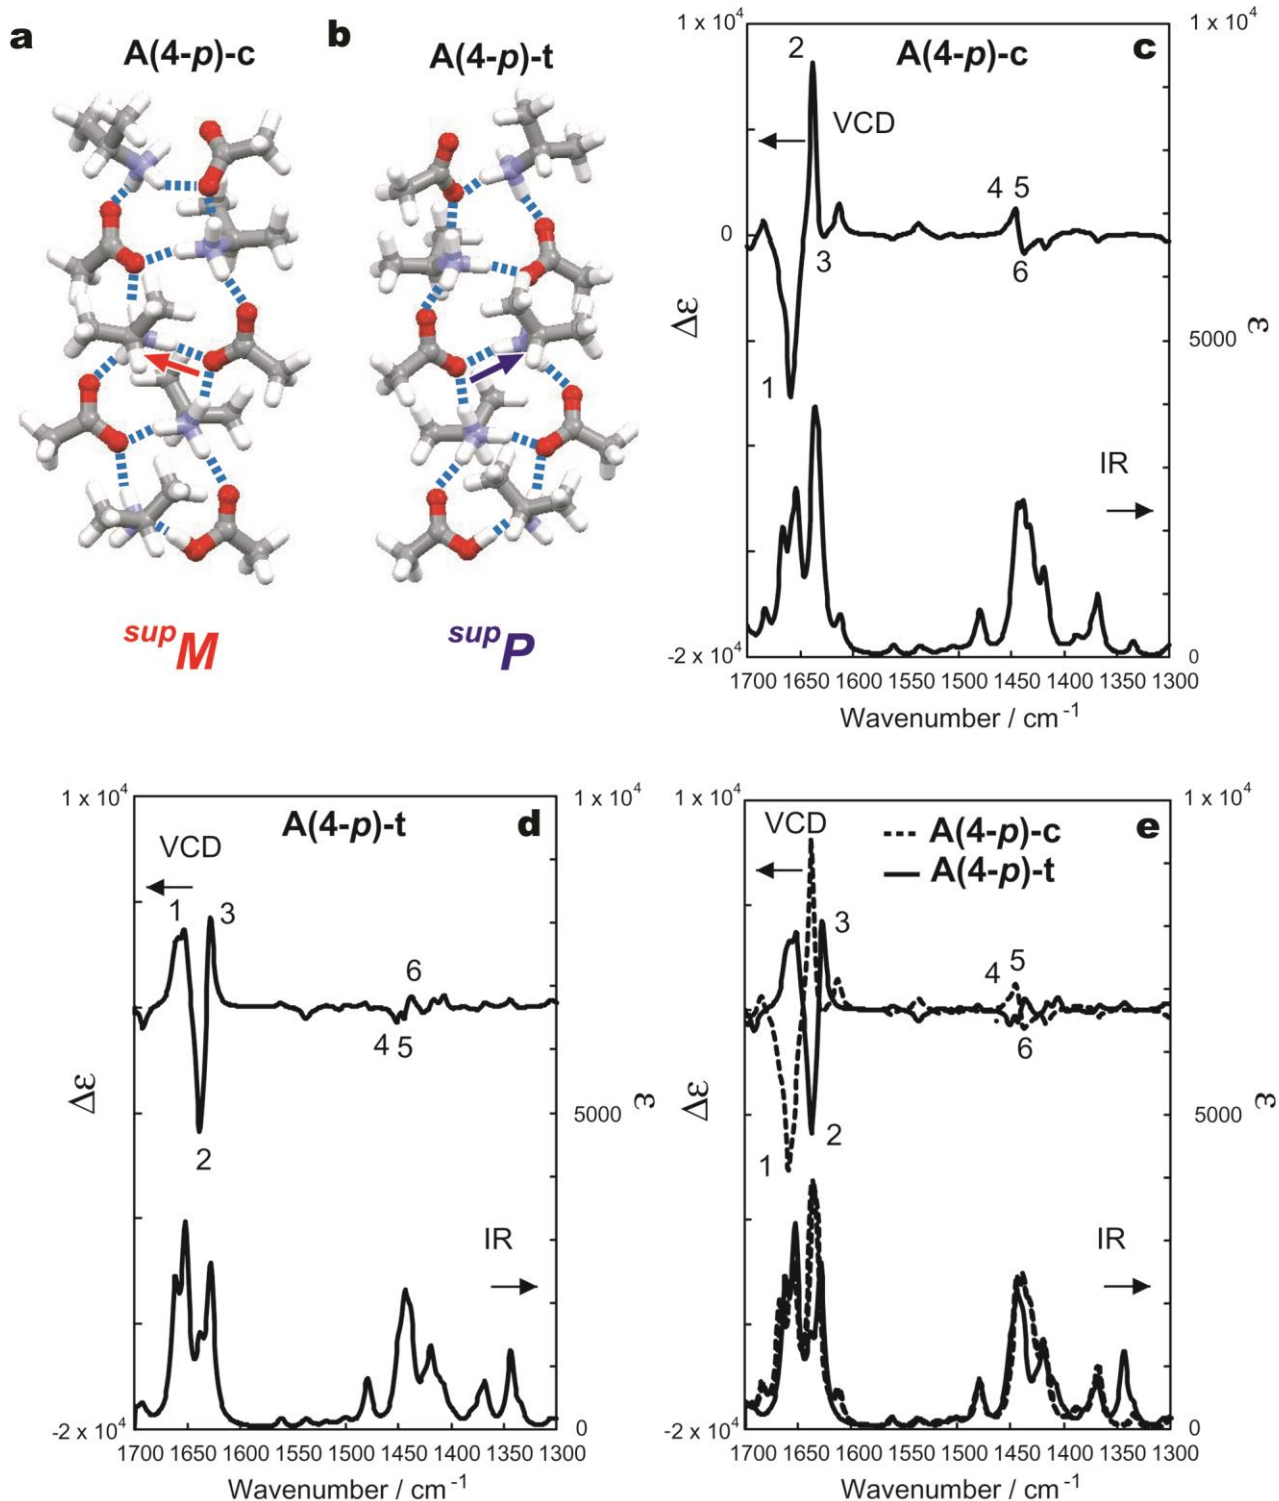

**Supplementary Figure S4. Calculated vibrational circular dichroism spectra<sup>32</sup>.** Optimised assembly manner of **A(4-*p*)-c** (a) and **A(4-*p*)-t** (b), whose phenyl rings were replaced by methyl groups. The calculated VCD and IR spectra of **A(4-*p*)-c** (c) and **A(4-*p*)-t** (d) as well as their superimposed spectra (e) based on (a) and (b) are shown.

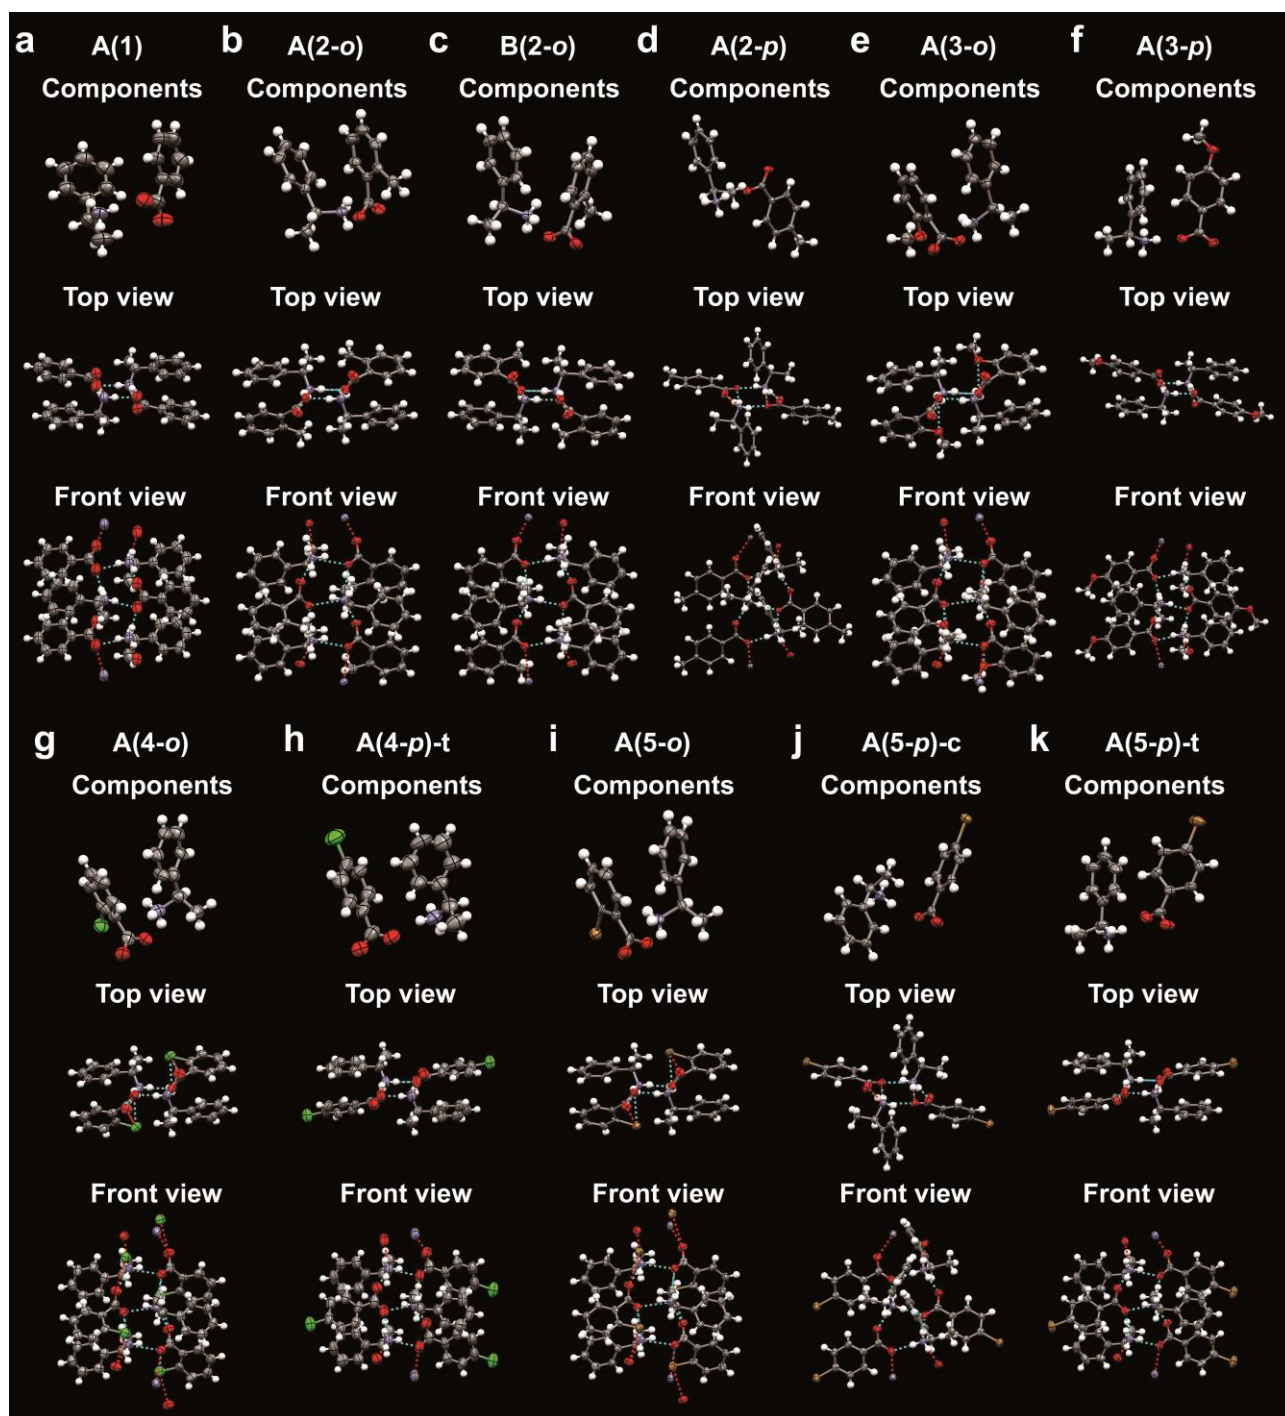

Supplementary Figure S5. Crystal structures of A(1) to A(5-*p*)-*t* with thermal ellipsoids at 50% probability.

**Supplementary Table S1. Crystal parameters of the A(1) to A(5-*p*)-t salts.**

| Entry                                | Handedness                        | Space group                                           | $\theta_r$ (°) <sup>[a]</sup> | $\theta_d$ (°) <sup>[b]</sup> | Length of HB $d_1/d_2/d_3$ (Å) <sup>[c]</sup> |
|--------------------------------------|-----------------------------------|-------------------------------------------------------|-------------------------------|-------------------------------|-----------------------------------------------|
| <b>A(1)</b>                          | <i>R</i> <sup>-sup</sup> <i>M</i> | <i>P</i> 2 <sub>1</sub> 2 <sub>1</sub> 2 <sub>1</sub> | +5.3                          | +1.25                         | 2.828/2.756/2.759                             |
| <b>A(2-<i>o</i>)</b>                 | <i>R</i> <sup>-sup</sup> <i>P</i> | <i>C</i> 2                                            | -34.8                         | +62.17                        | 2.748/2.789/2.709                             |
| <b>B(2-<i>o</i>)</b>                 | <i>S</i> <sup>-sup</sup> <i>M</i> | <i>C</i> 2                                            | +32.8                         | -62.05                        | 2.747/2.787/2.702                             |
| <b>A(2-<i>p</i>)</b>                 | <i>R</i> <sup>-sup</sup> <i>M</i> | <i>P</i> 2 <sub>1</sub> 2 <sub>1</sub> 2 <sub>1</sub> | +28.4                         | -6.42                         | 2.744/2.803/2.709                             |
| <b>A(3-<i>o</i>)</b>                 | <i>R</i> <sup>-sup</sup> <i>P</i> | <i>C</i> 2                                            | -41.2                         | +69.44                        | 2.761/2.822/2.720                             |
| <b>A(3-<i>p</i>)</b>                 | <i>R</i> <sup>-sup</sup> <i>M</i> | <i>P</i> 2 <sub>1</sub> 2 <sub>1</sub> 2 <sub>1</sub> | +11.0                         | -3.24                         | 2.791/2.766/2.764                             |
| <b>A(4-<i>o</i>)</b>                 | <i>R</i> <sup>-sup</sup> <i>P</i> | <i>C</i> 2                                            | -36.7                         | +62.97                        | 2.758/2.820/2.735                             |
| <b>A(4-<i>p</i>)-c<sup>[d]</sup></b> | <i>R</i> <sup>-sup</sup> <i>M</i> | <i>P</i> 2 <sub>1</sub> 2 <sub>1</sub> 2 <sub>1</sub> | +28.8                         | -9.31                         | 2.737/2.812/2.723                             |
| <b>A(4-<i>p</i>)-t</b>               | <i>R</i> <sup>-sup</sup> <i>P</i> | <i>P</i> 2 <sub>1</sub> 2 <sub>1</sub> 2 <sub>1</sub> | -19.8                         | +33.46                        | 2.732/2.827/2.687                             |
| <b>A(5-<i>o</i>)</b>                 | <i>R</i> <sup>-sup</sup> <i>P</i> | <i>C</i> 2                                            | -36.4                         | +61.97                        | 2.768/2.838/2.697                             |
| <b>A(5-<i>p</i>)-c</b>               | <i>R</i> <sup>-sup</sup> <i>M</i> | <i>P</i> 2 <sub>1</sub> 2 <sub>1</sub> 2 <sub>1</sub> | +28.1                         | -9.16                         | 2.752/2.789/2.712                             |
| <b>A(5-<i>p</i>)-t</b>               | <i>R</i> <sup>-sup</sup> <i>P</i> | <i>P</i> 2 <sub>1</sub> 2 <sub>1</sub> 2 <sub>1</sub> | -22.5                         | +34.22                        | 2.726/2.829/2.698                             |

[a] Tilted angles of carboxylates compared to line *l*, which is perpendicular to the helical axis. [b] Angles of carboxylic groups relative to the benzene rings. [c] Distance between the nitrogen atoms and the oxygen atoms. [d] See ref. 23.

**Supplementary Table S2. Crystallographic data for A(1), A(2-*o*) and B(2-*o*).**

|                                           | <b>A(1)</b>                                                 | <b>A(2-<i>o</i>)</b>                            | <b>B(2-<i>o</i>)</b>                            |
|-------------------------------------------|-------------------------------------------------------------|-------------------------------------------------|-------------------------------------------------|
| Formula                                   | C <sub>15</sub> H <sub>17</sub> NO <sub>2</sub>             | C <sub>16</sub> H <sub>19</sub> NO <sub>2</sub> | C <sub>16</sub> H <sub>19</sub> NO <sub>2</sub> |
| Formula weight                            | 243.30                                                      | 257.33                                          | 257.33                                          |
| Crystal shape                             | platelet                                                    | block                                           | block                                           |
| Crystal colour                            | colorless                                                   | colorless                                       | colorless                                       |
| Crystal size [mm]                         | 0.50 × 0.20 × 0.02                                          | 0.80 × 0.80 × 0.80                              | 0.30 × 0.10 × 0.10                              |
| Crystal system                            | orthorhombic                                                | monoclinic                                      | monoclinic                                      |
| Space group                               | <i>P</i> 2 <sub>1</sub> 2 <sub>1</sub> 2 <sub>1</sub> (#19) | <i>C</i> 2 (#5)                                 | <i>C</i> 2 (#5)                                 |
| <i>a</i> (Å)                              | 6.2479(3)                                                   | 19.9102(7)                                      | 19.9148(4)                                      |
| <i>b</i> (Å)                              | 7.2047(3)                                                   | 6.3171(2)                                       | 6.31798(12)                                     |
| <i>c</i> (Å)                              | 30.0153(11)                                                 | 11.6297(4)                                      | 11.6330(2)                                      |
| $\alpha$ (°)                              | 90                                                          | 90                                              | 90                                              |
| $\beta$ (°)                               | 90                                                          | 96.1560(19)                                     | 96.2021(10)                                     |
| $\gamma$ (°)                              | 90                                                          | 90                                              | 90                                              |
| <i>V</i> (Å <sup>3</sup> )                | 1351.11(9)                                                  | 1454.29(8)                                      | 1455.11(5)                                      |
| <i>Z</i>                                  | 4                                                           | 4                                               | 4                                               |
| <i>D</i> (g/cm <sup>3</sup> )             | 1.196                                                       | 1.175                                           | 1.175                                           |
| <i>T</i> (K)                              | 213.1                                                       | 213.1                                           | 213.1                                           |
| collected reflections                     | 15659                                                       | 6455                                            | 6674                                            |
| unique reflections                        | 2439                                                        | 2023                                            | 2038                                            |
| <i>R</i> 1 ( <i>I</i> > 2.0σ( <i>I</i> )) | 0.0850                                                      | 0.0409                                          | 0.0414                                          |
| <i>wR</i> 2 (all data)                    | 0.2630                                                      | 0.1116                                          | 0.1281                                          |
| GOF                                       | 1.044                                                       | 1.082                                           | 1.126                                           |
| Flack parameter                           | 0.5(9)                                                      | -0.0(2)                                         | -0.0(3)                                         |
| Supramolecular chirality                  | <sup>sup</sup> <i>M</i>                                     | <sup>sup</sup> <i>P</i>                         | <sup>sup</sup> <i>M</i>                         |
| CCDC                                      | 898257                                                      | 898260                                          | 898267                                          |

**Supplementary Table S3. Crystallographic data for A(2-*p*), A(3-*o*) and A(3-*p*).**

|                                           | <b>A(2-<i>p</i>)</b>                                        | <b>A(3-<i>o</i>)</b>                            | <b>A(3-<i>p</i>)</b>                                        |
|-------------------------------------------|-------------------------------------------------------------|-------------------------------------------------|-------------------------------------------------------------|
| Formula                                   | C <sub>16</sub> H <sub>19</sub> NO <sub>2</sub>             | C <sub>16</sub> H <sub>19</sub> NO <sub>3</sub> | C <sub>16</sub> H <sub>19</sub> NO <sub>3</sub>             |
| Formula weight                            | 257.33                                                      | 273.33                                          | 273.33                                                      |
| Crystal shape                             | needle                                                      | platelet                                        | platelet                                                    |
| Crystal colour                            | colorless                                                   | colorless                                       | colorless                                                   |
| Crystal size [mm]                         | 0.54 × 0.05 × 0.01                                          | 0.60 × 0.20 × 0.05                              | 0.50 × 0.40 × 0.30                                          |
| Crystal system                            | orthorhombic                                                | monoclinic                                      | orthorhombic                                                |
| Space group                               | <i>P</i> 2 <sub>1</sub> 2 <sub>1</sub> 2 <sub>1</sub> (#19) | <i>C</i> 2 (#5)                                 | <i>P</i> 2 <sub>1</sub> 2 <sub>1</sub> 2 <sub>1</sub> (#19) |
| <i>a</i> (Å)                              | 6.00560(10)                                                 | 21.6828(8)                                      | 6.12993(11)                                                 |
| <i>b</i> (Å)                              | 9.97430(10)                                                 | 6.3306(3)                                       | 7.22905(13)                                                 |
| <i>c</i> (Å)                              | 23.2107(3)                                                  | 10.9581(4)                                      | 33.5697(6)                                                  |
| $\alpha$ (°)                              | 90                                                          | 90                                              | 90                                                          |
| $\beta$ (°)                               | 90                                                          | 99.644(2)                                       | 90                                                          |
| $\gamma$ (°)                              | 90                                                          | 90                                              | 90                                                          |
| <i>V</i> (Å <sup>3</sup> )                | 1390.36(3)                                                  | 1482.89(10)                                     | 1487.60(5)                                                  |
| <i>Z</i>                                  | 4                                                           | 4                                               | 4                                                           |
| <i>D</i> (g/cm <sup>3</sup> )             | 1.229                                                       | 1.224                                           | 1.220                                                       |
| <i>T</i> (K)                              | 213.1                                                       | 213.1                                           | 213.1                                                       |
| collected reflections                     | 1883                                                        | 6725                                            | 25808                                                       |
| unique reflections                        | 1883                                                        | 2082                                            | 2684                                                        |
| <i>R</i> 1 ( <i>I</i> > 2.0σ( <i>I</i> )) | 0.0656                                                      | 0.0467                                          | 0.0359                                                      |
| <i>wR</i> 2 (all data)                    | 0.1824                                                      | 0.1189                                          | 0.1009                                                      |
| GOF                                       | 1.153                                                       | 1.091                                           | 1.077                                                       |
| Flack parameter                           | -2(2)                                                       | -0.2(3)                                         | 0.1(2)                                                      |
| Supramolecular chirality                  | <sup>sup</sup> <i>M</i>                                     | <sup>sup</sup> <i>P</i>                         | <sup>sup</sup> <i>M</i>                                     |
| CCDC                                      | 898265                                                      | 898261                                          | 898266                                                      |



**Supplementary Table S4. Crystallographic data for A(4-*o*), A(4-*p*)-*t* and A(5-*o*).**

|                                           | <b>A(4-<i>o</i>)</b>                              | <b>A(4-<i>p</i>)-<i>t</i></b>                       | <b>A(5-<i>o</i>)</b>                              |
|-------------------------------------------|---------------------------------------------------|-----------------------------------------------------|---------------------------------------------------|
| Formula                                   | C <sub>15</sub> H <sub>16</sub> ClNO <sub>2</sub> | C <sub>15</sub> H <sub>16</sub> ClNO <sub>2</sub>   | C <sub>15</sub> H <sub>16</sub> BrNO <sub>2</sub> |
| Formula weight                            | 277.75                                            | 277.75                                              | 322.20                                            |
| Crystal shape                             | platelet                                          | chunk                                               | chunk                                             |
| Crystal colour                            | colorless                                         | colorless                                           | colorless                                         |
| Crystal size [mm]                         | 0.30 × 0.10 × 0.01                                | 0.80 × 0.10 × 0.05                                  | 0.30 × 0.10 × 0.05                                |
| Crystal system                            | monoclinic                                        | orthorhombic                                        | monoclinic                                        |
| Space group                               | C2 (#5)                                           | P2 <sub>1</sub> 2 <sub>1</sub> 2 <sub>1</sub> (#19) | C2 (#5)                                           |
| <i>a</i> (Å)                              | 19.6704(6)                                        | 6.1390(7)                                           | 19.9477(4)                                        |
| <i>b</i> (Å)                              | 6.3049(2)                                         | 7.1015(7)                                           | 6.31696(15)                                       |
| <i>c</i> (Å)                              | 11.4702(4)                                        | 32.763(3)                                           | 11.5117(3)                                        |
| $\alpha$ (°)                              | 90                                                | 90                                                  | 90                                                |
| $\beta$ (°)                               | 95.949(2)                                         | 90                                                  | 95.8585(14)                                       |
| $\gamma$ (°)                              | 90                                                | 90                                                  | 90                                                |
| <i>V</i> (Å <sup>3</sup> )                | 1414.86(8)                                        | 1428.3(2)                                           | 1443.00(6)                                        |
| <i>Z</i>                                  | 4                                                 | 4                                                   | 4                                                 |
| <i>D</i> (g/cm <sup>3</sup> )             | 1.304                                             | 1.292                                               | 1.483                                             |
| <i>T</i> (K)                              | 213.1                                             | 213.1                                               | 213.1                                             |
| collected reflections                     | 6434                                              | 15132                                               | 7706                                              |
| unique reflections                        | 2210                                              | 2615                                                | 2544                                              |
| <i>R</i> 1 ( <i>I</i> > 2.0σ( <i>I</i> )) | 0.0881                                            | 0.0881                                              | 0.0862                                            |
| <i>wR</i> 2 (all data)                    | 0.2631                                            | 0.3095                                              | 0.2013                                            |
| GOF                                       | 1.088                                             | 0.909                                               | 1.106                                             |
| Flack parameter                           | 0.03(5)                                           | -0.04(7)                                            | 0.03(6)                                           |
| Supramolecular chirality                  | <sup>sup</sup> <i>P</i>                           | <sup>sup</sup> <i>P</i>                             | <sup>sup</sup> <i>P</i>                           |
| CCDC                                      | 898259                                            | 898264                                              | 898258                                            |

**Supplementary Table S5. Crystallographic data for A(5-*p*)-c and A(5-*p*)-t.**

|                                           | <b>A(5-<i>p</i>)-c</b>                                      | <b>A(5-<i>p</i>)-t</b>                                      |
|-------------------------------------------|-------------------------------------------------------------|-------------------------------------------------------------|
| Formula                                   | C <sub>15</sub> H <sub>16</sub> BrNO <sub>2</sub>           | C <sub>15</sub> H <sub>16</sub> BrNO <sub>2</sub>           |
| Formula weight                            | 322.20                                                      | 322.20                                                      |
| Crystal shape                             | needle                                                      | chunk                                                       |
| Crystal colour                            | colourless                                                  | colorless                                                   |
| Crystal size [mm]                         | 0.80 × 0.10 × 0.10                                          | 0.80 × 0.10 × 0.05                                          |
| Crystal system                            | orthorhombic                                                | orthorhombic                                                |
| Space group                               | <i>P</i> 2 <sub>1</sub> 2 <sub>1</sub> 2 <sub>1</sub> (#19) | <i>P</i> 2 <sub>1</sub> 2 <sub>1</sub> 2 <sub>1</sub> (#19) |
| <i>a</i> (Å)                              | 5.94850(11)                                                 | 6.1477(2)                                                   |
| <i>b</i> (Å)                              | 10.08149(18)                                                | 7.1718(2)                                                   |
| <i>c</i> (Å)                              | 23.3879(4)                                                  | 33.2349(9)                                                  |
| $\alpha$ (°)                              | 90                                                          | 90                                                          |
| $\beta$ (°)                               | 90                                                          | 90                                                          |
| $\gamma$ (°)                              | 90                                                          | 90                                                          |
| <i>V</i> (Å <sup>3</sup> )                | 1402.57(4)                                                  | 1465.33(8)                                                  |
| <i>Z</i>                                  | 4                                                           | 4                                                           |
| <i>D</i> (g/cm <sup>3</sup> )             | 1.526                                                       | 1.460                                                       |
| <i>T</i> (K)                              | 213.1                                                       | 213.1                                                       |
| collected reflections                     | 22715                                                       | 15079                                                       |
| unique reflections                        | 2519                                                        | 2657                                                        |
| <i>R</i> 1 ( <i>I</i> > 2.0σ( <i>I</i> )) | 0.0406                                                      | 0.0757                                                      |
| <i>wR</i> 2 (all data)                    | 0.0946                                                      | 0.2038                                                      |
| GOF                                       | 1.187                                                       | 1.057                                                       |
| Flack parameter                           | -0.03(3)                                                    | -0.01(5)                                                    |
| Supramolecular chirality                  | <sup>sup</sup> <i>M</i>                                     | <sup>sup</sup> <i>P</i>                                     |
| CCDC                                      | 898262                                                      | 898263                                                      |

## Supplementary References

32. Frisch, M. J.; Trucks, G. W.; Schlegel, H. B.; Scuseria, G. E.; Robb, M. A.; Cheeseman, J. R.; Scalmani, G.; Barone, V.; Mennucci, B.; Petersson, G. A.; Nakatsuji, H.; Caricato, M.; Li, X.; Hratchian, H. P.; Izmaylov, A. F.; Bloino, J.; Zheng, G.; Sonnenberg, J. L.; Hada, M.; Ehara, M.; Toyota, K.; Fukuda, R.; Hasegawa, J.; Ishida, M.; Nakajima, T.; Honda, Y.; Kitao, O.; Nakai, H.; Vreven, T.; Montgomery, Jr., J. A.; Peralta, J. E.; Ogliaro, F.; Bearpark, M.; Heyd, J. J.; Brothers, E.; Kudin, K. N.; Staroverov, V. N.; Kobayashi, R.; Normand, J.; Raghavachari, K.; Rendell, A.; Burant, J. C.; Iyengar, S. S.; Tomasi, J.; Cossi, M.; Rega, N.; Millam, J. M.; Klene, M.; Knox, J. E.; Cross, J. B.; Bakken, V.; Adamo, C.; Jaramillo, J.; Gomperts, R.; Stratmann, R. E.; Yazyev, O.; Austin, A. J.; Cammi, R.; Pomelli, C.; Ochterski, J. W.; Martin, R. L.; Morokuma, K.; Zakrzewski, V. G.; Voth, G. A.; Salvador, P.; Dannenberg, J. J.; Dapprich, S.; Daniels, A. D.; Farkas, Ö.; Foresman, J. B.; Ortiz, J. V.; Cioslowski, J.; Fox, D. J. Gaussian 09, Revision C.01 (Gaussian, Inc., Wallingford CT, 2009).
